# Supplementary material for: A high-throughput, whole cell assay to identify compounds active against carbapenem-resistant Klebsiella pneumoniae
Source: PubMed Central journal article supplement (PMC6303040; doi:10.1371/journal.pone.0209389), 2018-12-21
Supplement: pone.0209389.s001.pdf [file pone.0209389.s001.pdf]

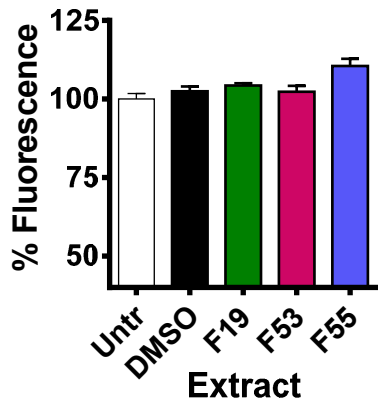

**Figure S1. Three fungal extract hits have no cytotoxicity effects on HeLa cells.** Extracts F19, F53, and F55 were incubated with HeLa cells for 20 hours. Viability was measured by resazurin reduction and expressed as the percent fluorescence compared to untreated cells.
