# Supplementary material for: A high-throughput, whole cell assay to identify compounds active against carbapenem-resistant Klebsiella pneumoniae
Source: PubMed Central journal article supplement (PMC6303040; doi:10.1371/journal.pone.0209389), 2018-12-21
Supplement: pone.0209389.s002.pdf [file pone.0209389.s002.pdf]

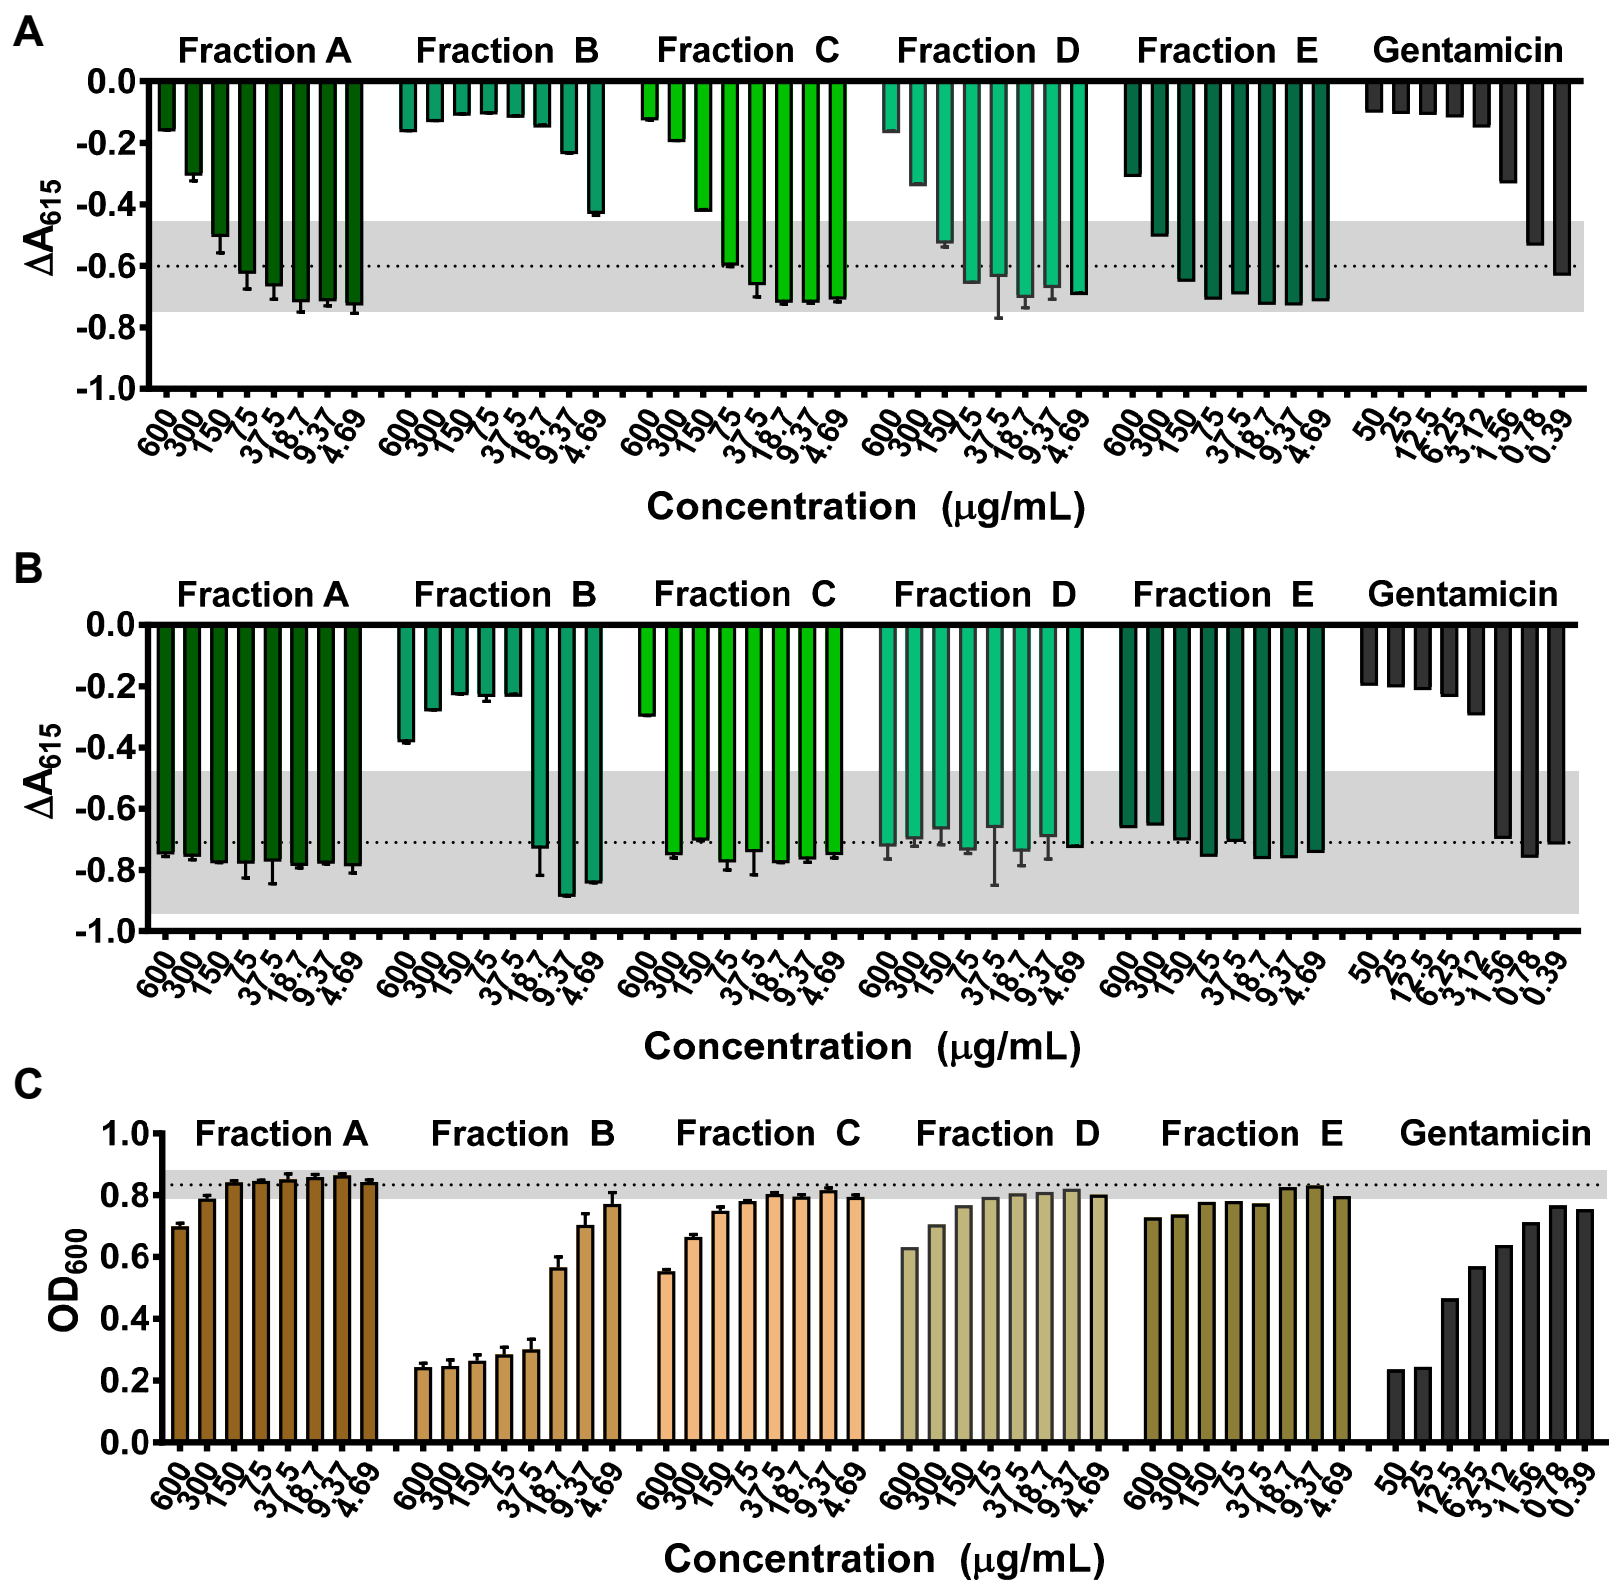

**Figure S2. Inhibition of *K. pneumoniae* sugar fermentation and growth by fractions of fungal extract F19.** Fractions derived from extract F19 were tested for **A**, inhibition of fermentation after 7 hr. **B**, Inhibition of fermentation after 22 hours. and **C**, inhibition of growth after 22 hours. Gentamicin was used as a positive control. The dashed line indicates the average value of the negative control. The gray area indicates three standard deviations above and below the negative control average.
