# Supplementary material for: A high-throughput, whole cell assay to identify compounds active against carbapenem-resistant Klebsiella pneumoniae
Source: PubMed Central journal article supplement (PMC6303040; doi:10.1371/journal.pone.0209389), 2018-12-21
Supplement: pone.0209389.s003.pdf [file pone.0209389.s003.pdf]

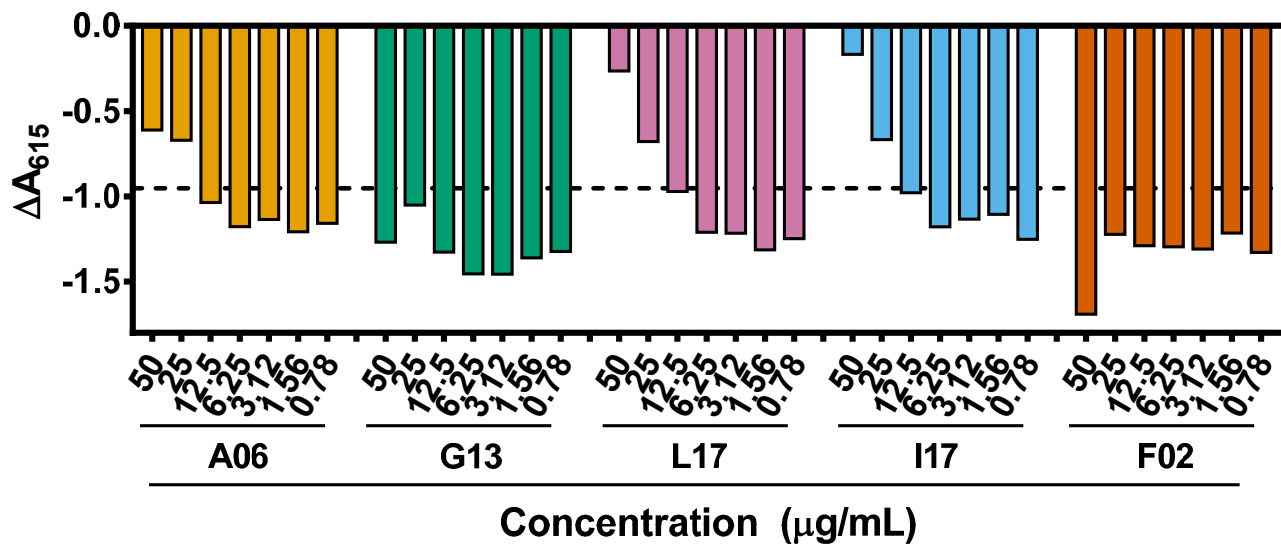

**Figure S3. Inhibition of fermentation by additional compounds.** Inhibition of mannose fermentation by additional compounds at 22 hr.
