# Supplementary material for: A high-throughput, whole cell assay to identify compounds active against carbapenem-resistant Klebsiella pneumoniae
Source: PubMed Central journal article supplement (PMC6303040; doi:10.1371/journal.pone.0209389), 2018-12-21
Supplement: pone.0209389.s004.pdf [file pone.0209389.s004.pdf]

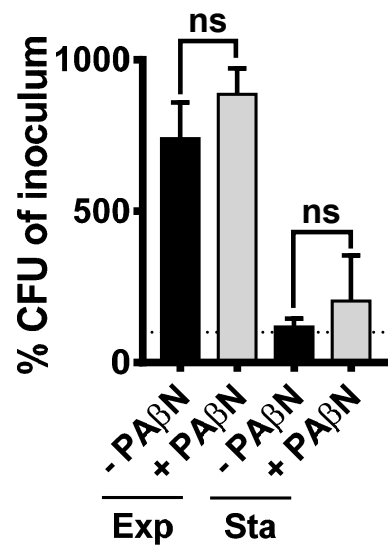

**Figure S4. The efflux pump inhibitor phenylalanine-arginine  $\beta$ -naphthylamide (PA $\beta$ N) does not affect bacterial viability.** Colony forming units of *K. pneumoniae* harvested at exponential (Exp) or stationary (Sta) phase and incubated for 4 hr in medium containing the efflux pump inhibitor phenylalanine-arginine  $\beta$ -naphthylamide (PA $\beta$ N, 40  $\mu$ g/mL ) alone. Dotted horizontal line represents the number of colony forming units (CFU) prior to incubation. Error bars represent the standard deviation. A student's t-test was used to calculate statistical significance. ns not significant.
