# Supplementary material for: A high-throughput, whole cell assay to identify compounds active against carbapenem-resistant Klebsiella pneumoniae
Source: PubMed Central journal article supplement (PMC6303040; doi:10.1371/journal.pone.0209389), 2018-12-21
Supplement: pone.0209389.s005.pdf [file pone.0209389.s005.pdf]

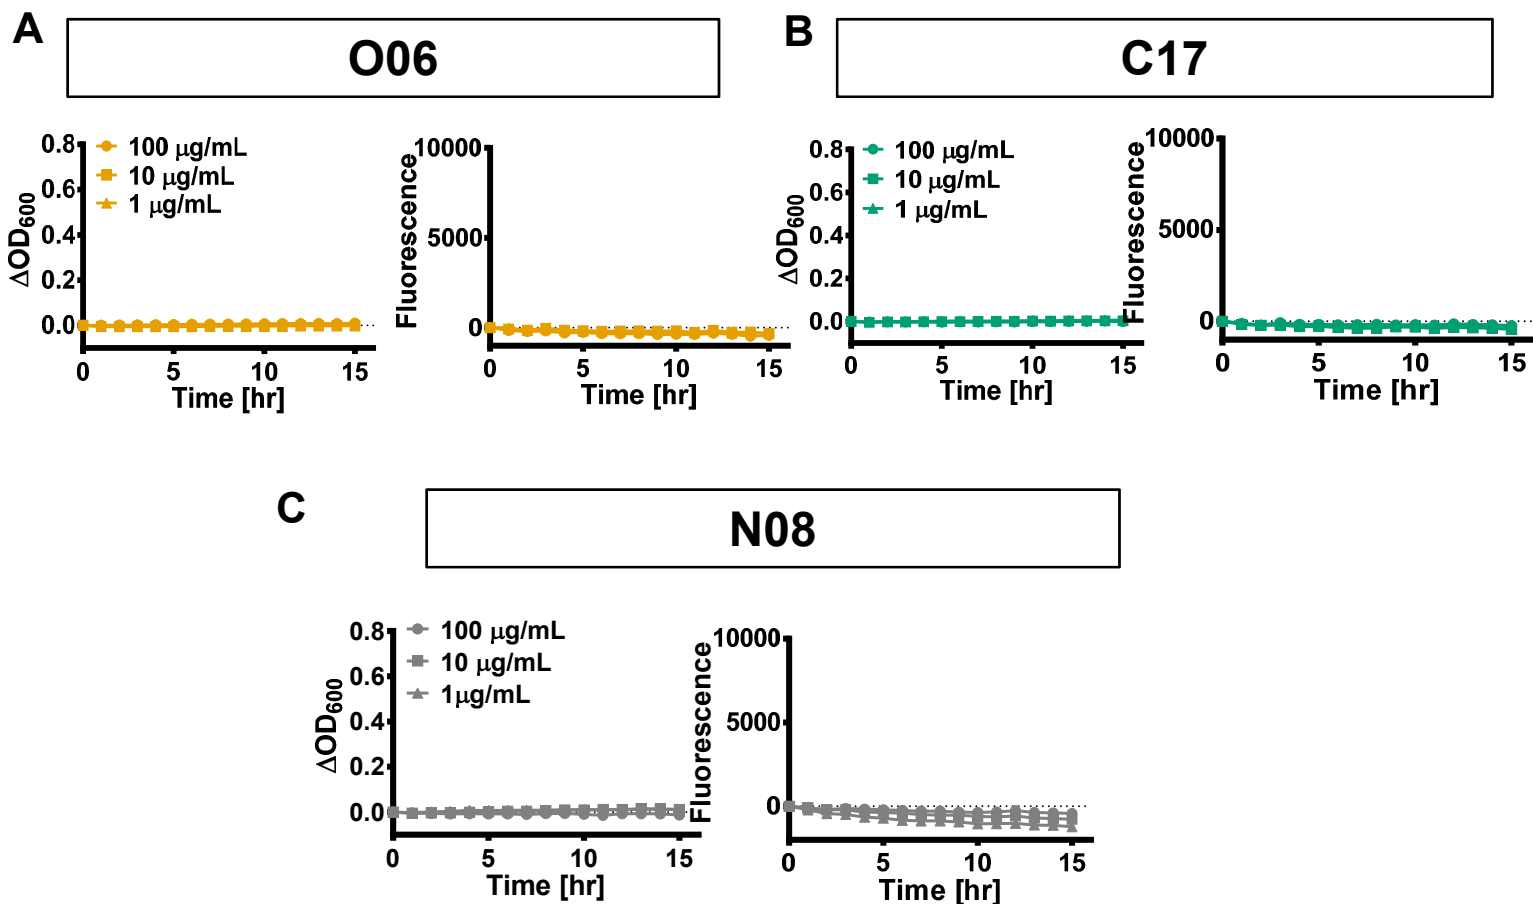

**Figure S5. Synthetic compounds O06, C17, and N08 do not contribute background fluorescence at the excitation and emission spectra of GFP.** Compounds diluted into LB medium were incubated for 15 hr at 37°C. Fluorescence (excitation at 480nm and emission at 515nm) and  $OD_{600}$  were measured every 30 min with **A**, Compound O06. **B**, Compound C17. **C**, Compound N08.
