# Supplementary material for: A high-throughput, whole cell assay to identify compounds active against carbapenem-resistant Klebsiella pneumoniae
Source: PubMed Central journal article supplement (PMC6303040; doi:10.1371/journal.pone.0209389), 2018-12-21
Supplement: pone.0209389.s006.pdf [file pone.0209389.s006.pdf]

**S1 Table: Composition of the defined medium used in HTS**

| <b><u>Component</u></b>                         | <b><u>g/L</u></b> | <b><u>mM</u></b> |
|-------------------------------------------------|-------------------|------------------|
| Alanine                                         | 0.3               | 3.37             |
| Arginine HCl                                    | 0.2               | 0.95             |
| cysteine                                        | 0.02              | 0.17             |
| glycine                                         | 0.13              | 1.73             |
| Histidine HCl                                   | 0.17              | 0.89             |
| isoleucine                                      | 0.3               | 2.29             |
| leucine                                         | 0.5               | 3.81             |
| lysine                                          | 0.5               | 3.42             |
| methionine                                      | 0.1               | 0.67             |
| phenylalanine                                   | 0.2               | 1.21             |
| serine                                          | 0.2               | 1.9              |
| threonine                                       | 0.2               | 1.68             |
| tyrosine                                        | 0.04              | 0.22             |
| valine                                          | 0.4               | 3.41             |
| KH <sub>2</sub> PO <sub>4</sub>                 | 0.012g            | 0.088            |
| K <sub>2</sub> HPO <sub>4</sub>                 | 0.028             | 0.16             |
| (NH <sub>4</sub> ) <sub>2</sub> SO <sub>4</sub> | 0.008             | 0.06             |
| KCl                                             | 0.75              | 10               |
| CaCl <sub>2</sub> · 2H <sub>2</sub> O           | 0.05              | 0.34             |
| MgSO <sub>4</sub> · 7H <sub>2</sub> O           | 0.2               | 0.811            |
| Fe SO <sub>4</sub> · 7H <sub>2</sub> O          | 0.00017           | 0.00061          |
| NaCl                                            | 5.8               | 100              |
| mannose                                         | 4                 | 22.2             |
