# Supplementary material for: A high-throughput, whole cell assay to identify compounds active against carbapenem-resistant Klebsiella pneumoniae
Source: PubMed Central journal article supplement (PMC6303040; doi:10.1371/journal.pone.0209389), 2018-12-21
Supplement: pone.0209389.s007.pdf [file pone.0209389.s007.pdf]

**S2 Table. Known bioactive compounds identified in the pilot HTS assay.**

| <b>Compound name</b>                          | <b>Class</b>                    |
|-----------------------------------------------|---------------------------------|
| <b>Bioactive plates 3+4 (ICCB 2089, 2090)</b> |                                 |
| Rifamycin sv                                  | Antibacterial                   |
| Rifampicin                                    | Antibacterial                   |
| Minocycline hydrochloride                     | Antibacterial                   |
| Doxycycline hydrochloride                     | Antibacterial                   |
| Clinafloxacin hydrochloride                   | Antibacterial                   |
| Sulfadiazine                                  | Antibacterial                   |
| Gemcitabine hydrochloride                     | Antineoplastic                  |
| Doxifluridine                                 | Antineoplastic                  |
| 5-fluorouracil                                | Antineoplastic, anti-metabolite |
| Floxuridine                                   | Antineoplastic, anti-metabolite |
| Auranofin                                     | Anti-inflammatory               |
